# Supplementary material for: Green tea intake and the risk of hypertension in premenopausal women: the TCLSIH cohort study
Source: Royal Society of Chemistry journal article supplement (doi:10.1039/d2fo03342a), 2023-01-01
Supplement: d2fo03342a1.pdf [file d2fo03342a1.pdf]

**Supplemental Table 1.** Association of green tea consumption with annual change in SBP or DBP, in the premenopausal women (n=6,633) <sup>a</sup>

|                             | $\beta$ (95% confidence interval) | <i>P</i> value |
|-----------------------------|-----------------------------------|----------------|
| <b>Annual change in SBP</b> |                                   |                |
| Model 1 <sup>b</sup>        | 0.097 (-0.018, 0.213)             | 0.10           |
| Model 2 <sup>c</sup>        | 0.067 (-0.0495, 0.184)            | 0.26           |
| Model 3 <sup>d</sup>        | 0.099 (-0.046, 0.244)             | 0.18           |
| <b>Annual change in DBP</b> |                                   |                |
| Model 1                     | 0.028 (-0.063, 0.120)             | 0.54           |
| Model 2                     | 0.015 (-0.078, 0.107)             | 0.76           |
| Model 3                     | 0.039 (-0.076, 0.154)             | 0.11           |

<sup>a</sup> Linear regression models were used, and  $\beta$  were calculated from one standard deviation increase in green tea consumption.

<sup>b</sup> Model 1 was crude model.

<sup>c</sup> Model 2 was further Adjusted for age, sex, and BMI.

<sup>d</sup> Model 3 was additionally adjusted for age, sex, BMI, smoking status, alcohol consumption status, education levels, employment status, household income, physical activity, depression symptoms, total energy intake, dietary patterns, family history of disease (including cardiovascular disease, hypertension, hyperlipidemia, and diabetes), hyperlipidemia, and diabetes.
